# Supplementary material for: New Phocoenamicin and Maklamicin Analogues from Cultures of Three Marine-Derived Micromonospora Strains
Source: MDPI journal article supplement (doi:10.3390/md21080443), 2023-08-07
Supplement: s1 [file s1]

# New Phocoenamicin and Maklamicin Analogues from Cultures of Three Marine-Derived *Micromonospora* Strains

Maria Kokkini <sup>1,\*</sup>, Daniel Oves-Costales <sup>1</sup>, Pilar Sánchez <sup>1</sup>, Ángeles Melguizo <sup>1</sup>, Thomas A. Mackenzie <sup>1</sup>, Mercedes Pérez-Bonilla <sup>1</sup>, Jesús Martín <sup>1</sup>, Arianna Giusti <sup>2</sup>, Peter de Witte <sup>2</sup>, Francisca Vicente <sup>1</sup>, Olga Genilloud <sup>1</sup> and Fernando Reyes <sup>1,\*</sup>

<sup>1</sup>Fundación MEDINA, Centro de Excelencia en Investigación de Medicamentos Innovadores en Andalucía, Parque Tecnológico Ciencias de la Salud, Avda. del Conocimiento 34, Armilla, 18016 Granada, Spain

<sup>2</sup>Laboratory for Molecular Biodiscovery, Department of Pharmaceutical and Pharmacological Sciences, University of Leuven, O & N II Herestraat 49-box 824, 3000 Leuven, Belgium

\*Correspondence: [maria.kokkini@medinaandalucia.es](mailto:maria.kokkini@medinaandalucia.es) (M.K.); [fernando.reyes@medinaandalucia.es](mailto:fernando.reyes@medinaandalucia.es) (F.R.);  
Tel.: +34-958-993-965 (F.R.)

## Contents

- Figure S1.** UV spectrum of compound 1.
- Figure S2.** ESI-TOF spectrum of compound 1.
- Figure S3.** <sup>1</sup>H NMR (methanol-*d*<sub>4</sub>, 500 MHz) spectrum of compound 1.
- Figure S4.** <sup>13</sup>C NMR (methanol-*d*<sub>4</sub>, 125 MHz) spectrum of compound 1.
- Figure S5.** HSQC spectrum of compound 1.
- Figure S6.** COSY spectrum of compound 1.
- Figure S7.** HMBC spectrum of compound 1.
- Figure S8.** NOESY spectrum of compound 1.
- Figure S9.** UV spectrum of compound 2.
- Figure S10.** ESI-TOF spectrum of compound 2.
- Figure S11.** <sup>1</sup>H NMR (methanol-*d*<sub>4</sub>, 500 MHz) spectrum of compound 2.
- Figure S12.** <sup>13</sup>C NMR (methanol-*d*<sub>4</sub>, 125 MHz) spectrum of compound 2.
- Figure S13.** HSQC spectrum of compound 2.
- Figure S14.** COSY spectrum of compound 2.
- Figure S15.** HMBC spectrum of compound 2.
- Figure S16.** NOESY spectrum of compound 2.
- Figure S17.** UV spectrum of compound 6.
- Figure S18.** ESI-TOF spectrum of compound 6.
- Figure S19.** <sup>1</sup>H NMR (methanol-*d*<sub>4</sub>, 500 MHz) spectrum of compound 6.
- Figure S20.** <sup>13</sup>C NMR (methanol-*d*<sub>4</sub>, 125 MHz) spectrum of compound 6.
- Figure S21.** HSQC spectrum of compound 6.
- Figure S22.** COSY spectrum of compound 6.
- Figure S23.** HMBC spectrum of compound 6.
- Figure S24.** ROESY spectrum of compound 6.
- Figure S25.** Key NOESY correlations observed in phocoenamicin E (2).
- Figure S26.** Key ROESY correlations observed in maklamicin B (6).

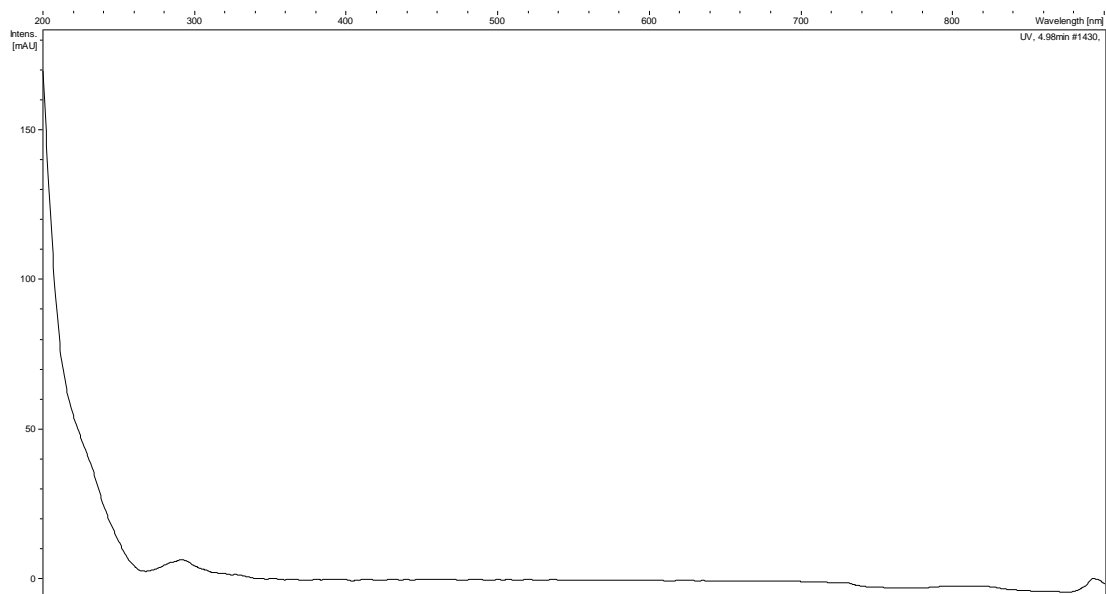

**Figure S1.** UV spectrum of compound 1.

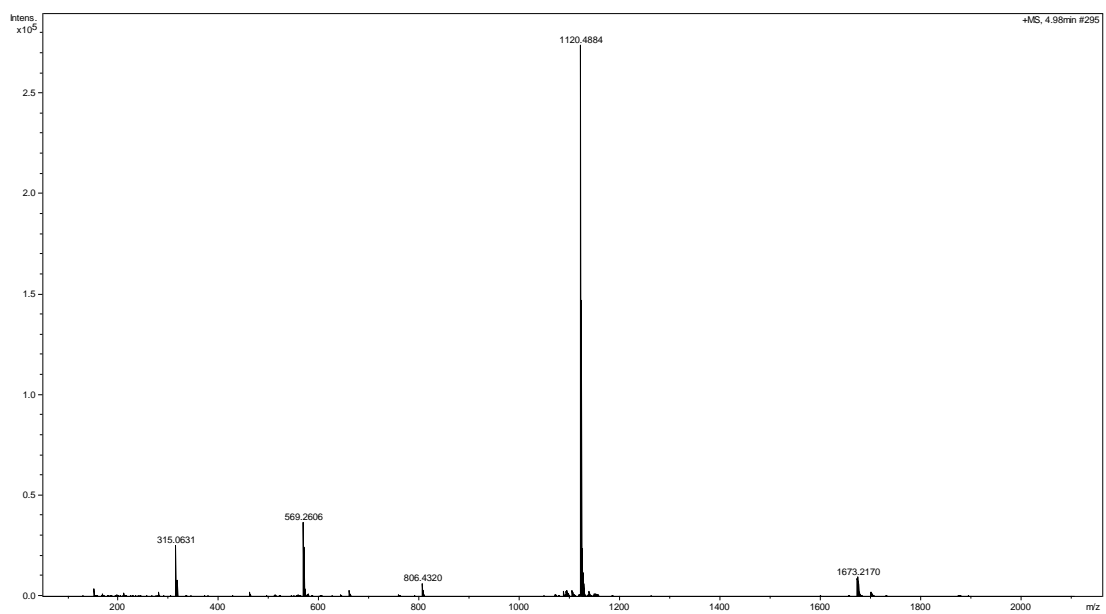

**Figure S2.** ESI-TOF spectrum of compound 1.

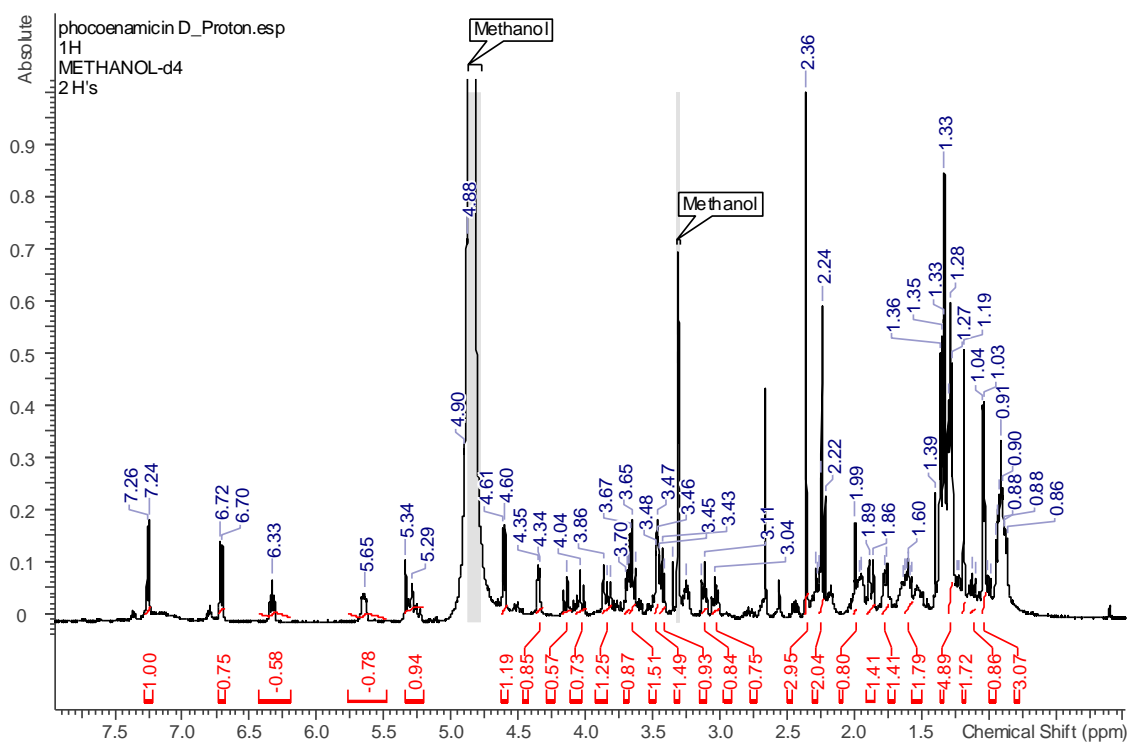

**Figure S3.**  $^1\text{H}$  NMR (methanol- $d_4$ , 500 MHz) spectrum of compound 1.

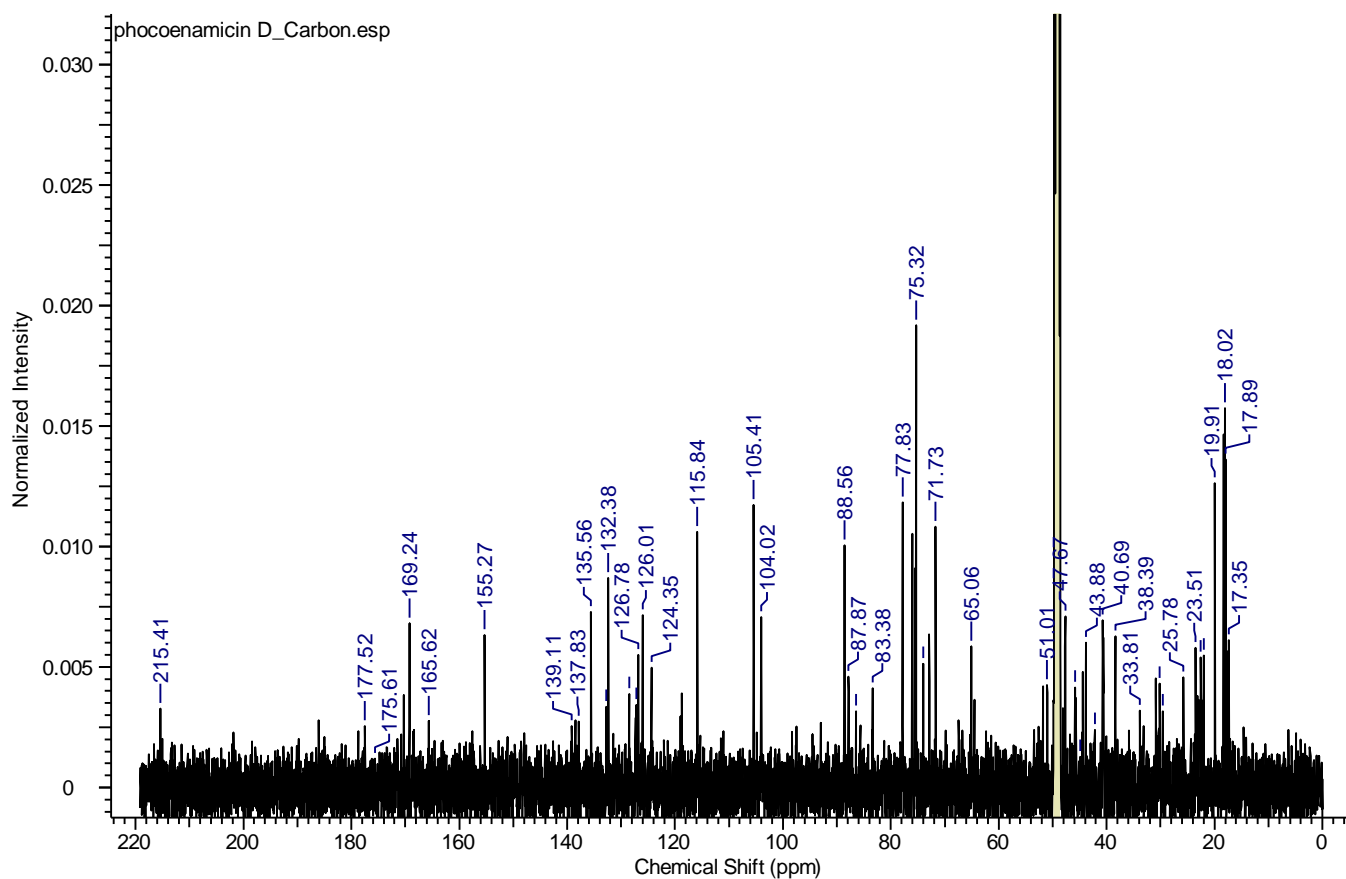

**Figure S4.**  $^{13}\text{C}$  NMR (methanol- $d_4$ , 125 MHz) spectrum of compound 1.

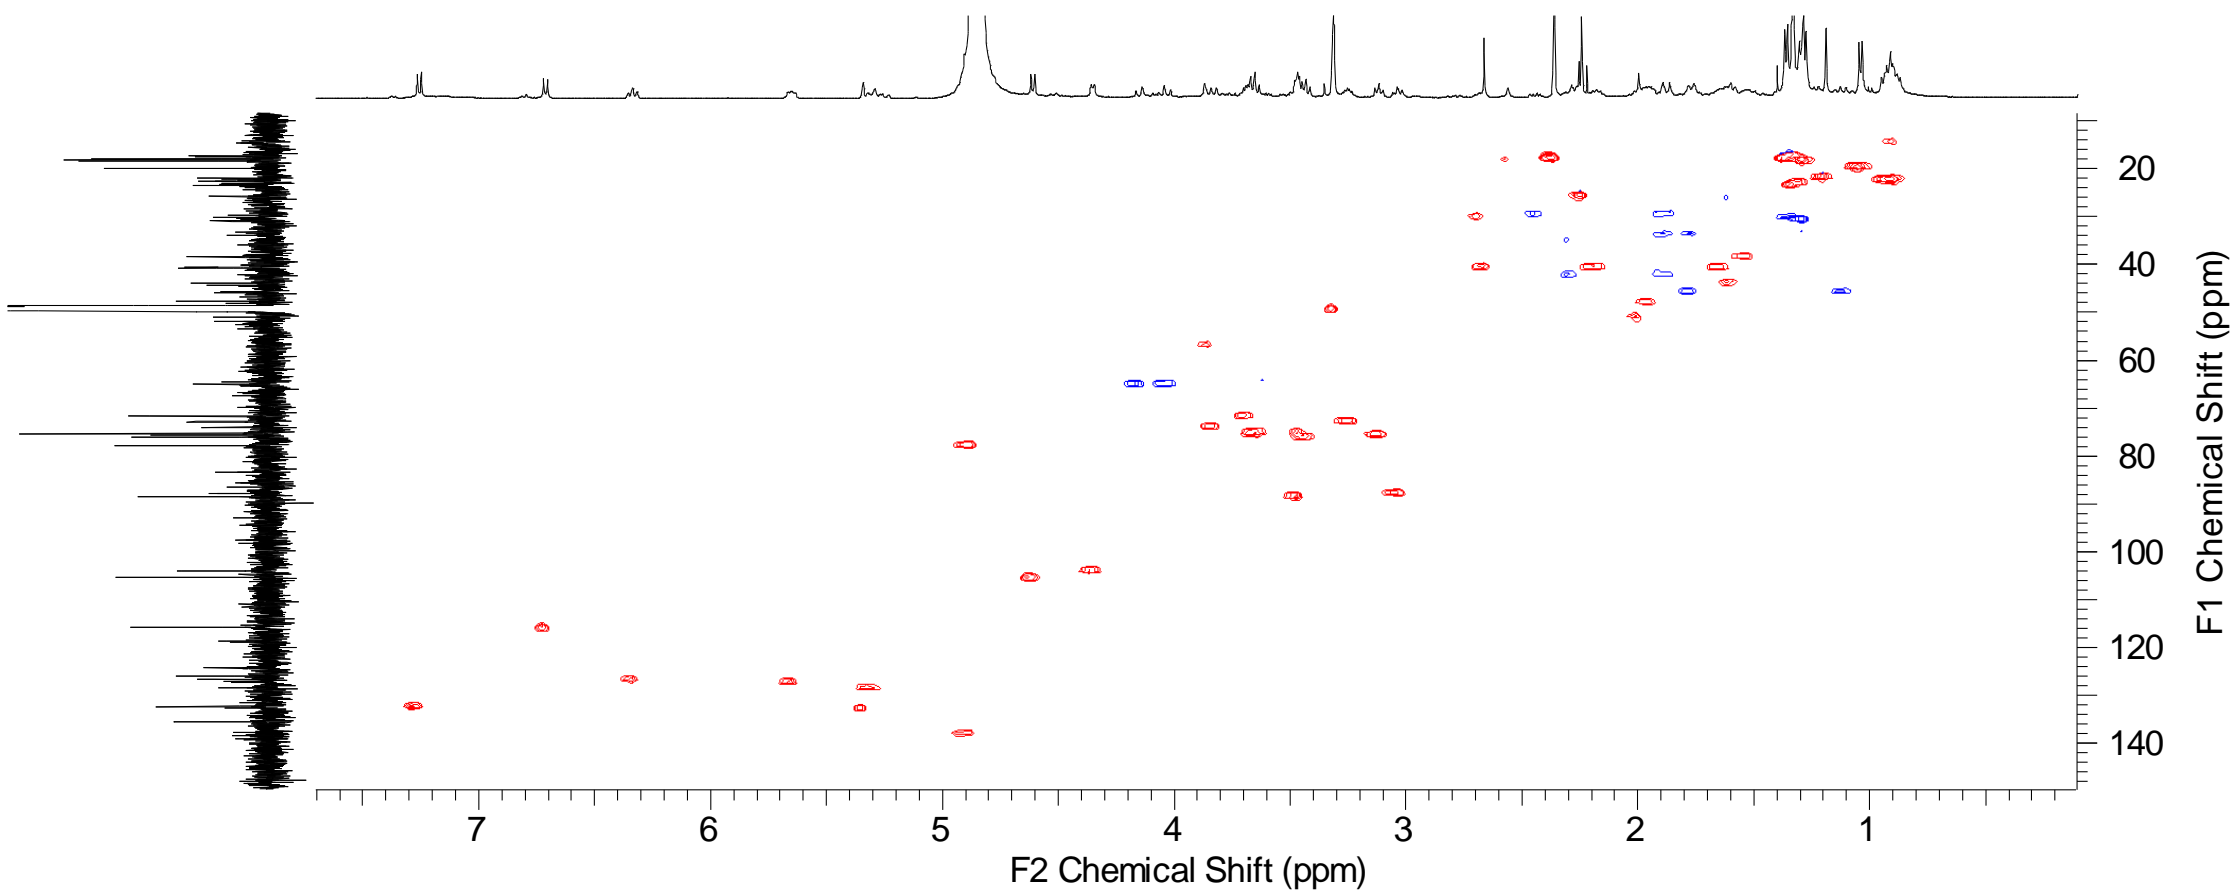

Figure S5. HSQC spectrum of compound 1.



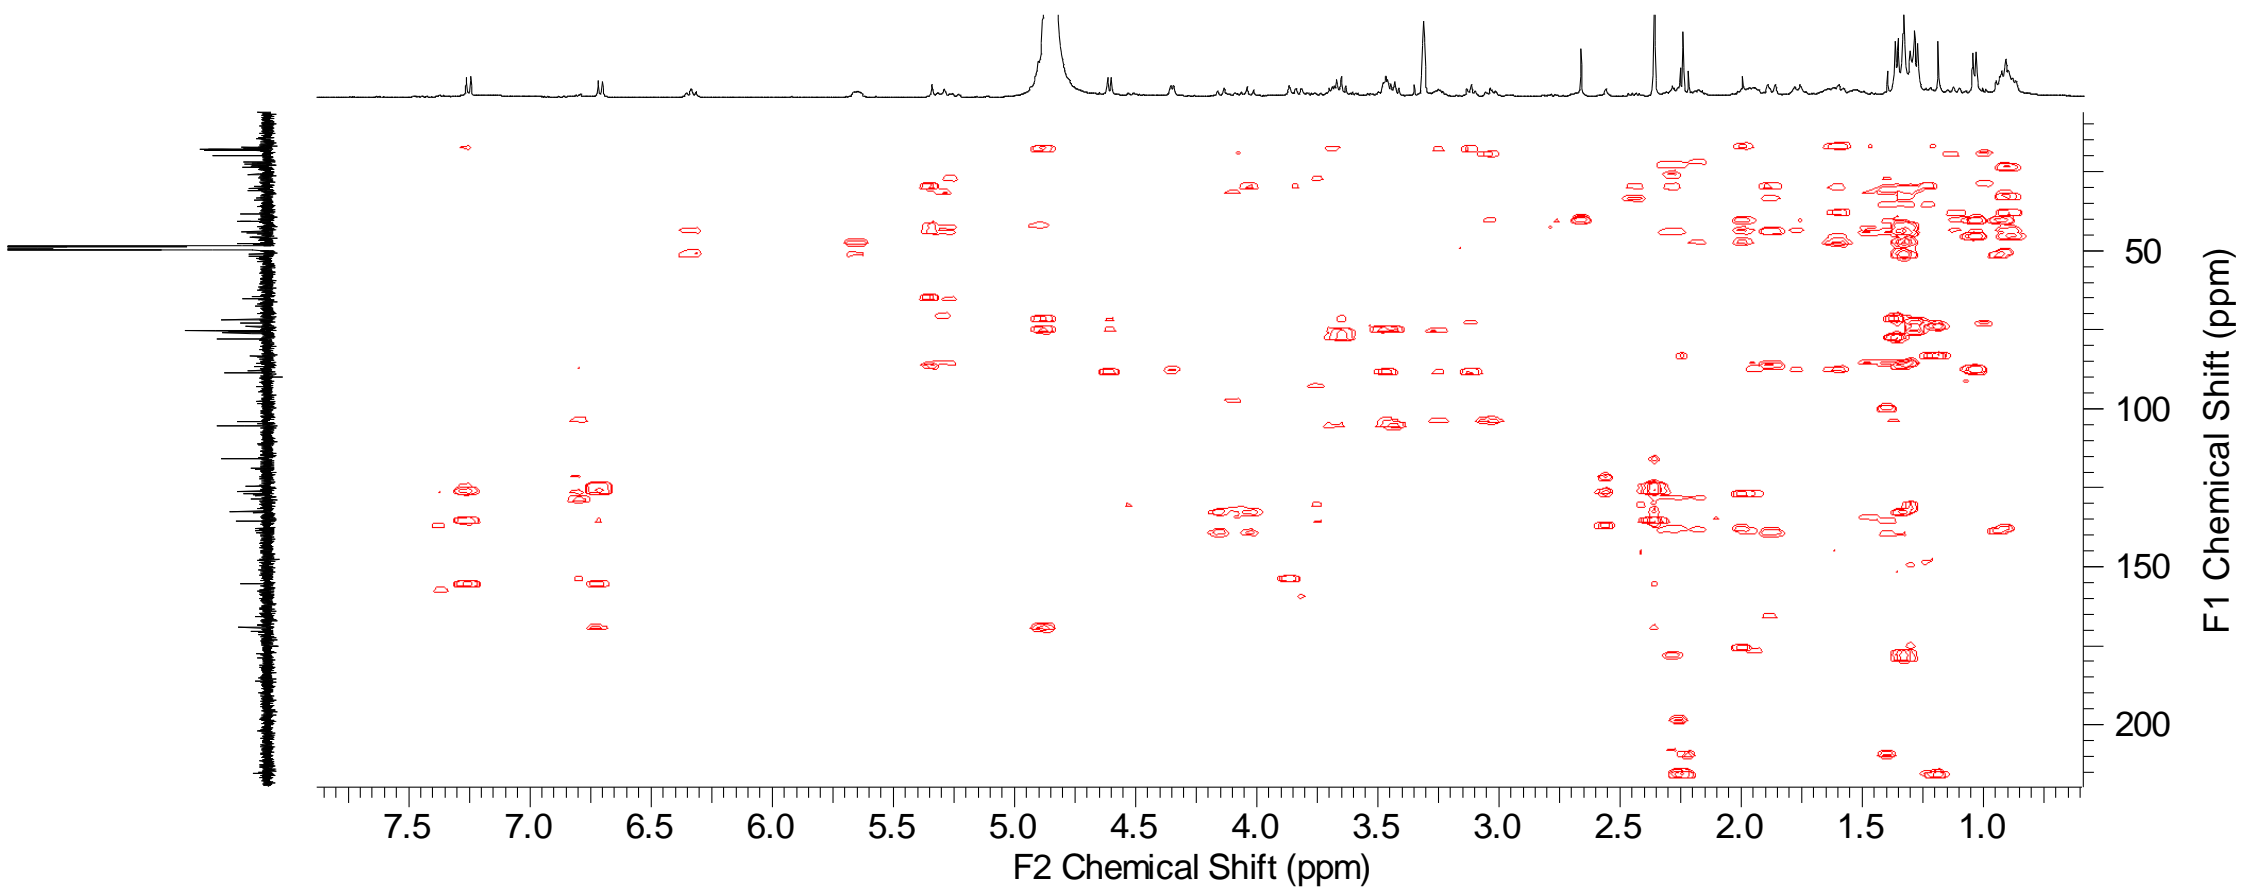

Figure S7. HMBC spectrum of compound 1.

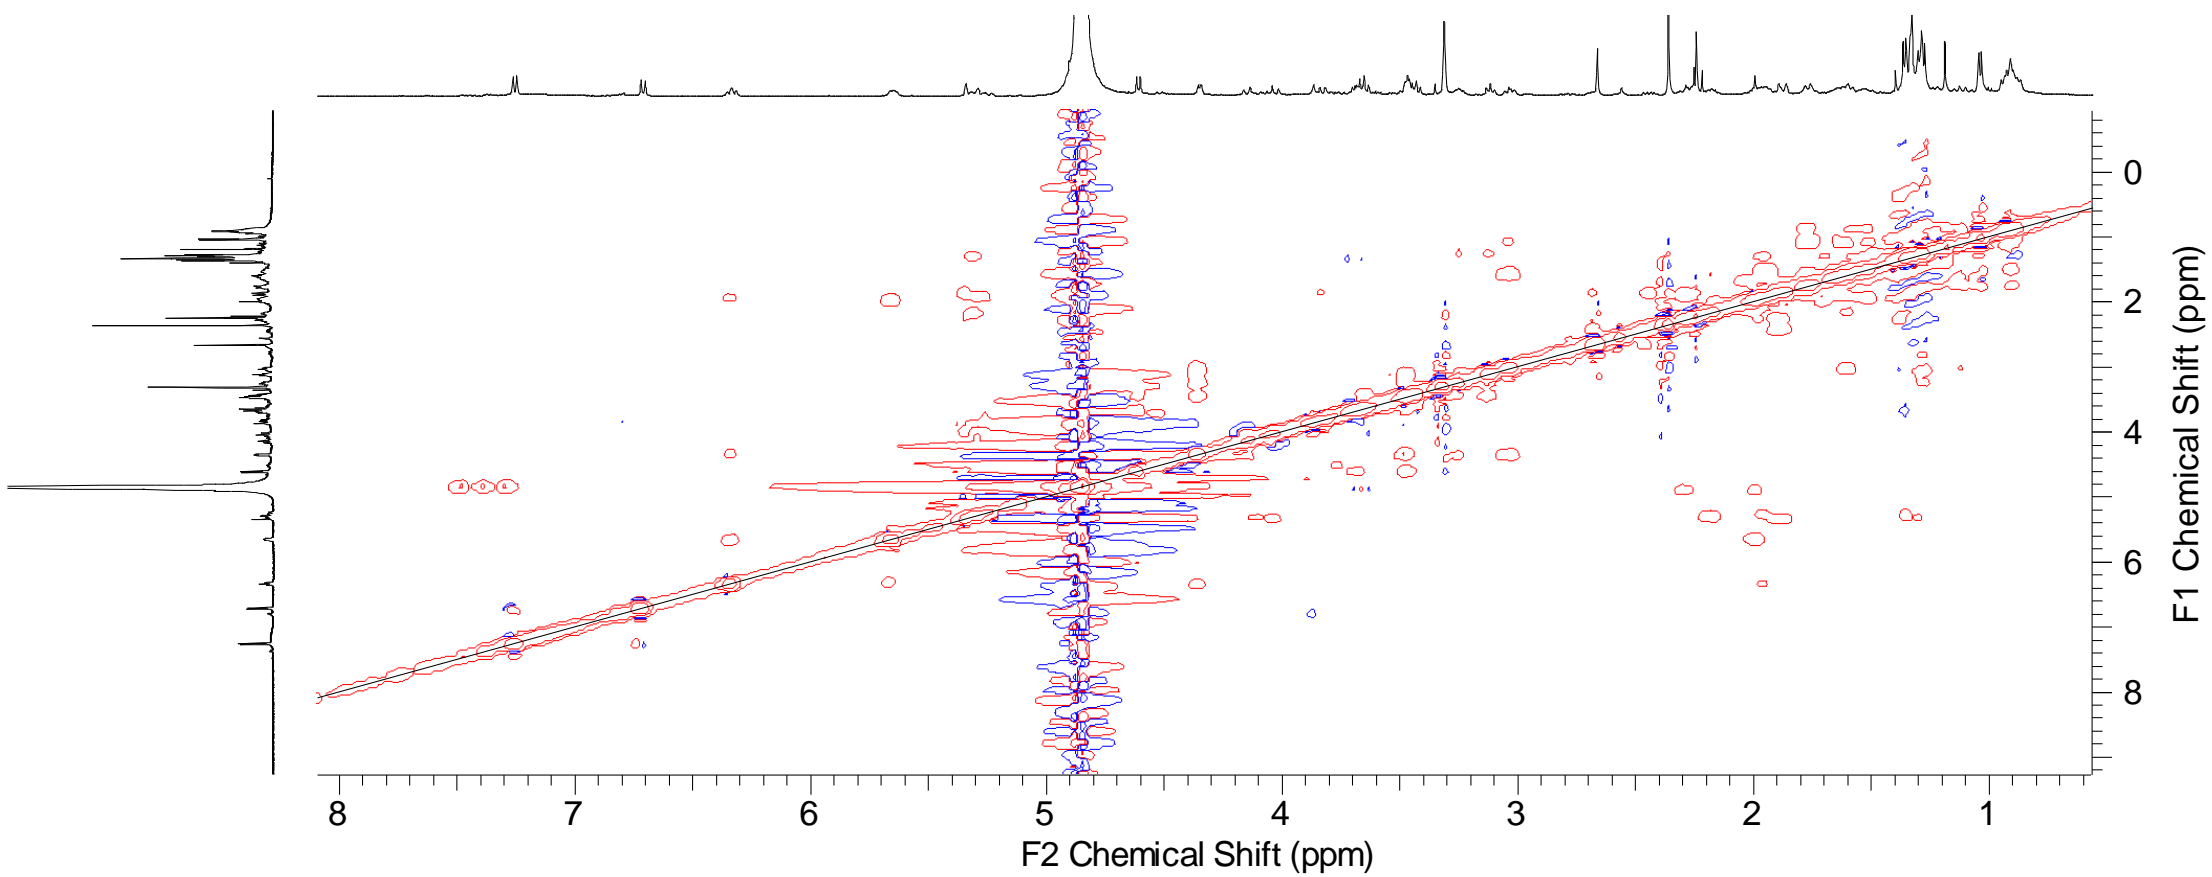

Figure S8. NOESY spectrum of compound 1.

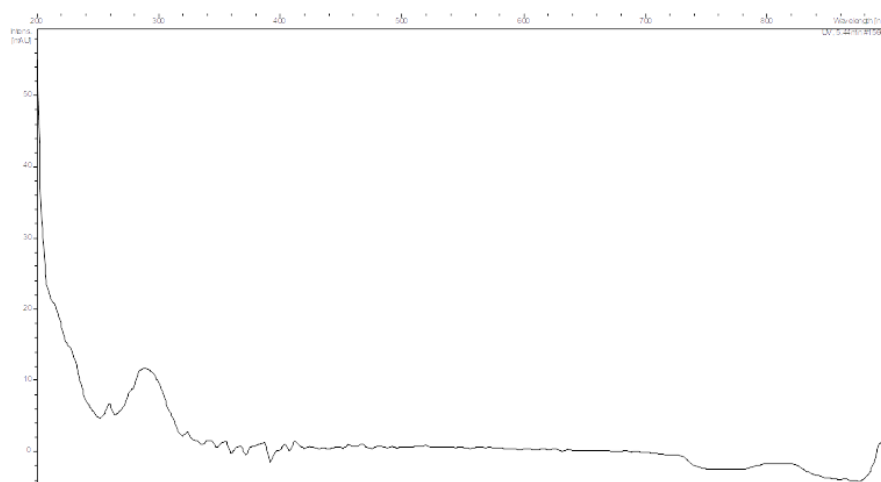

**Figure S9.** UV spectrum of compound **2**.

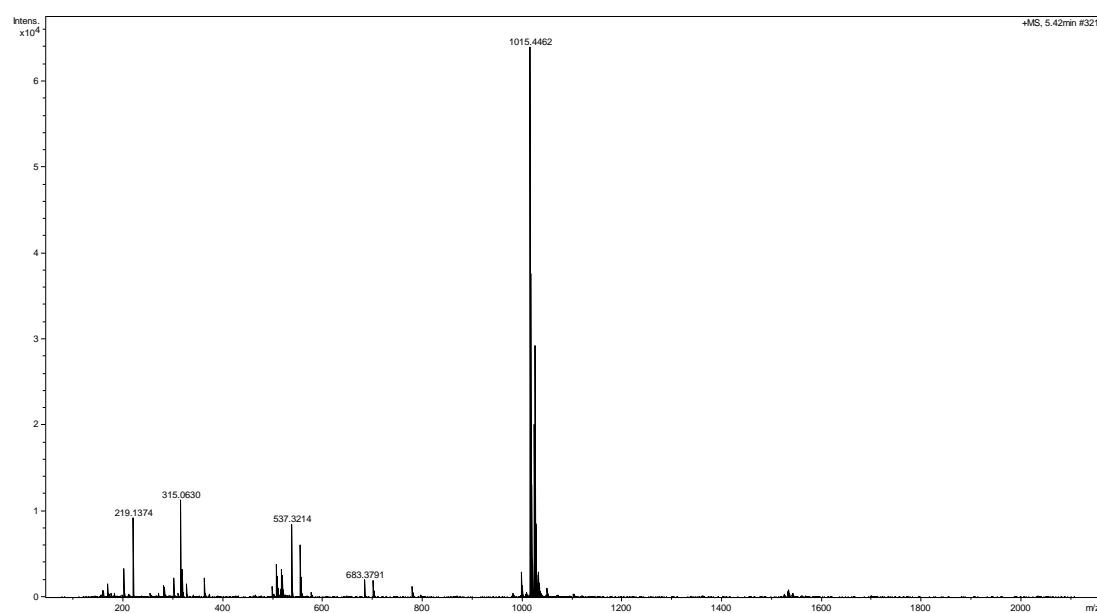

**Figure S10.** ESI-TOF spectrum of compound **2**.



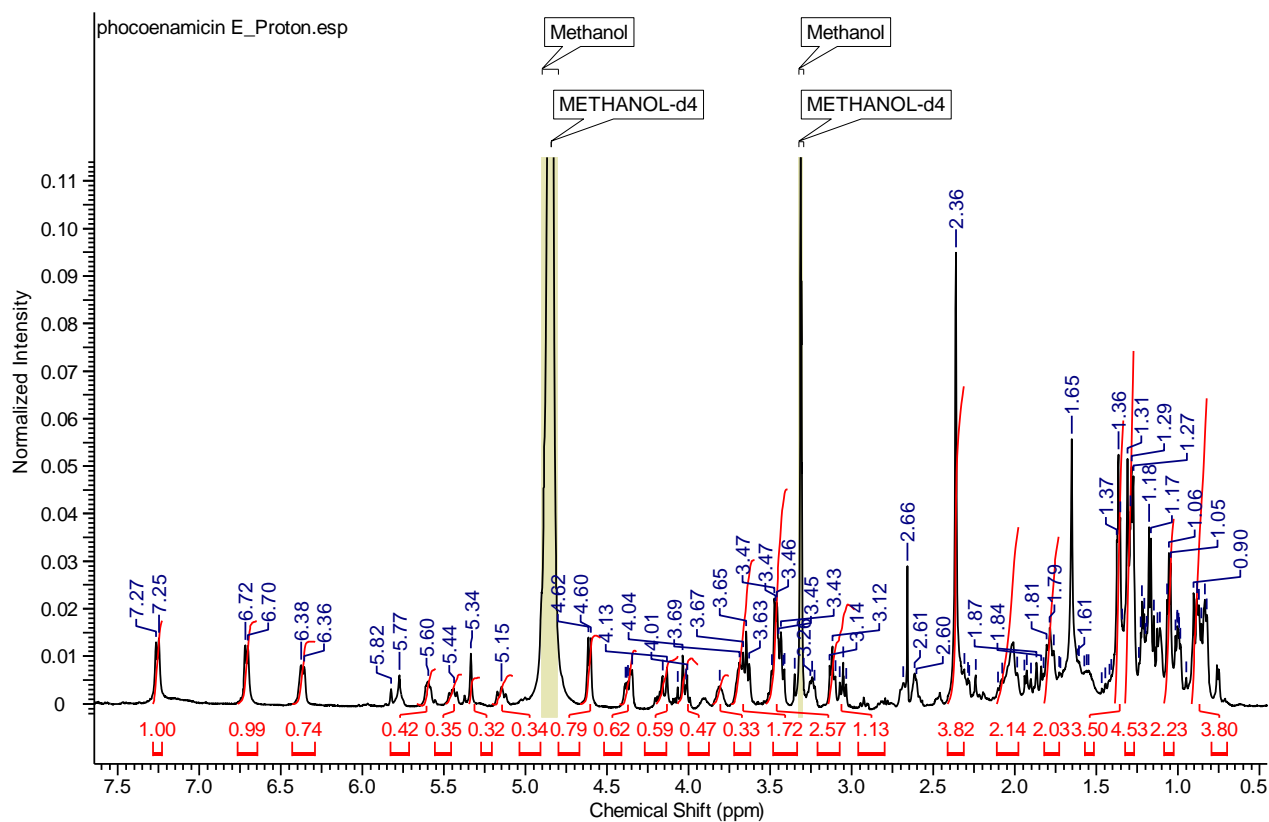

**Figure S11.**  $^1\text{H}$  NMR (methanol- $d_4$ , 500 MHz) spectrum of compound 3.

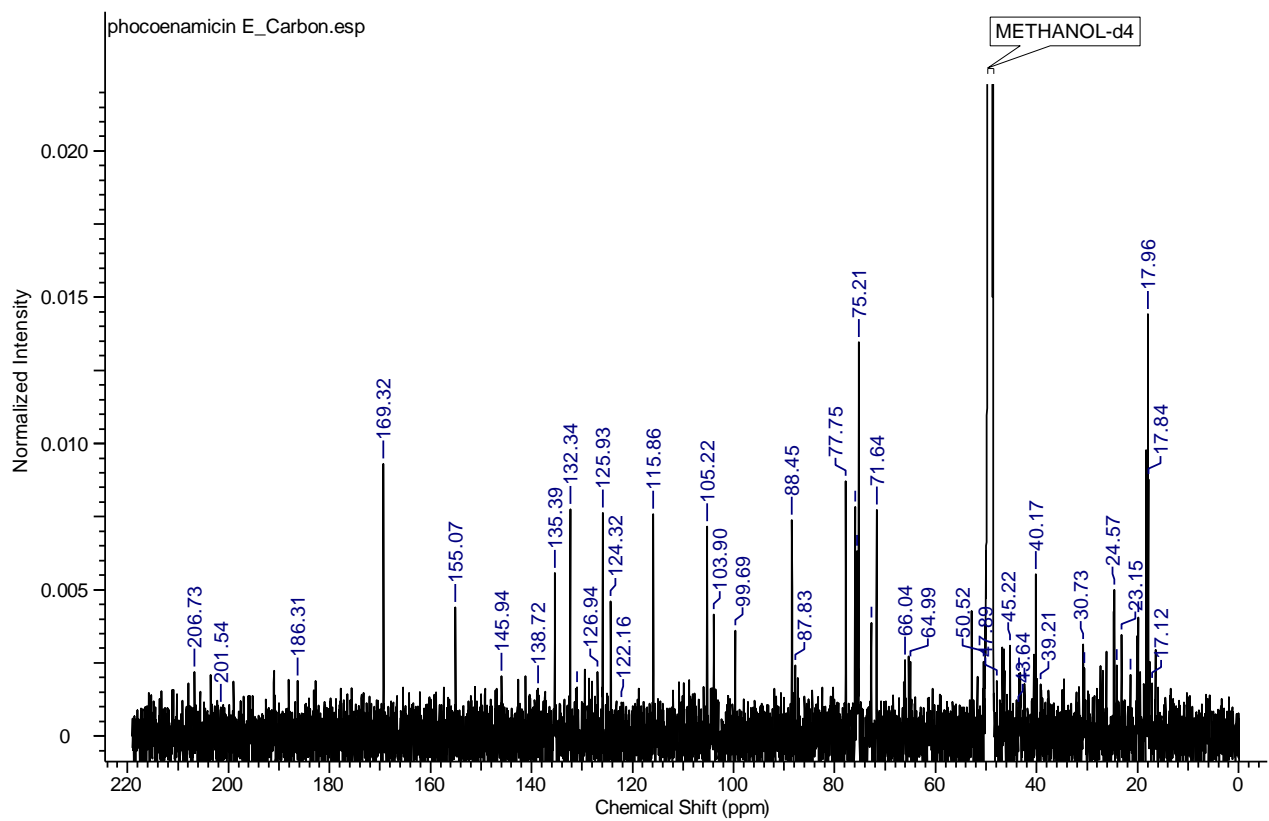

**Figure S12.**  $^{13}\text{C}$  NMR (methanol- $d_4$ , 125 MHz) spectrum of compound 2.

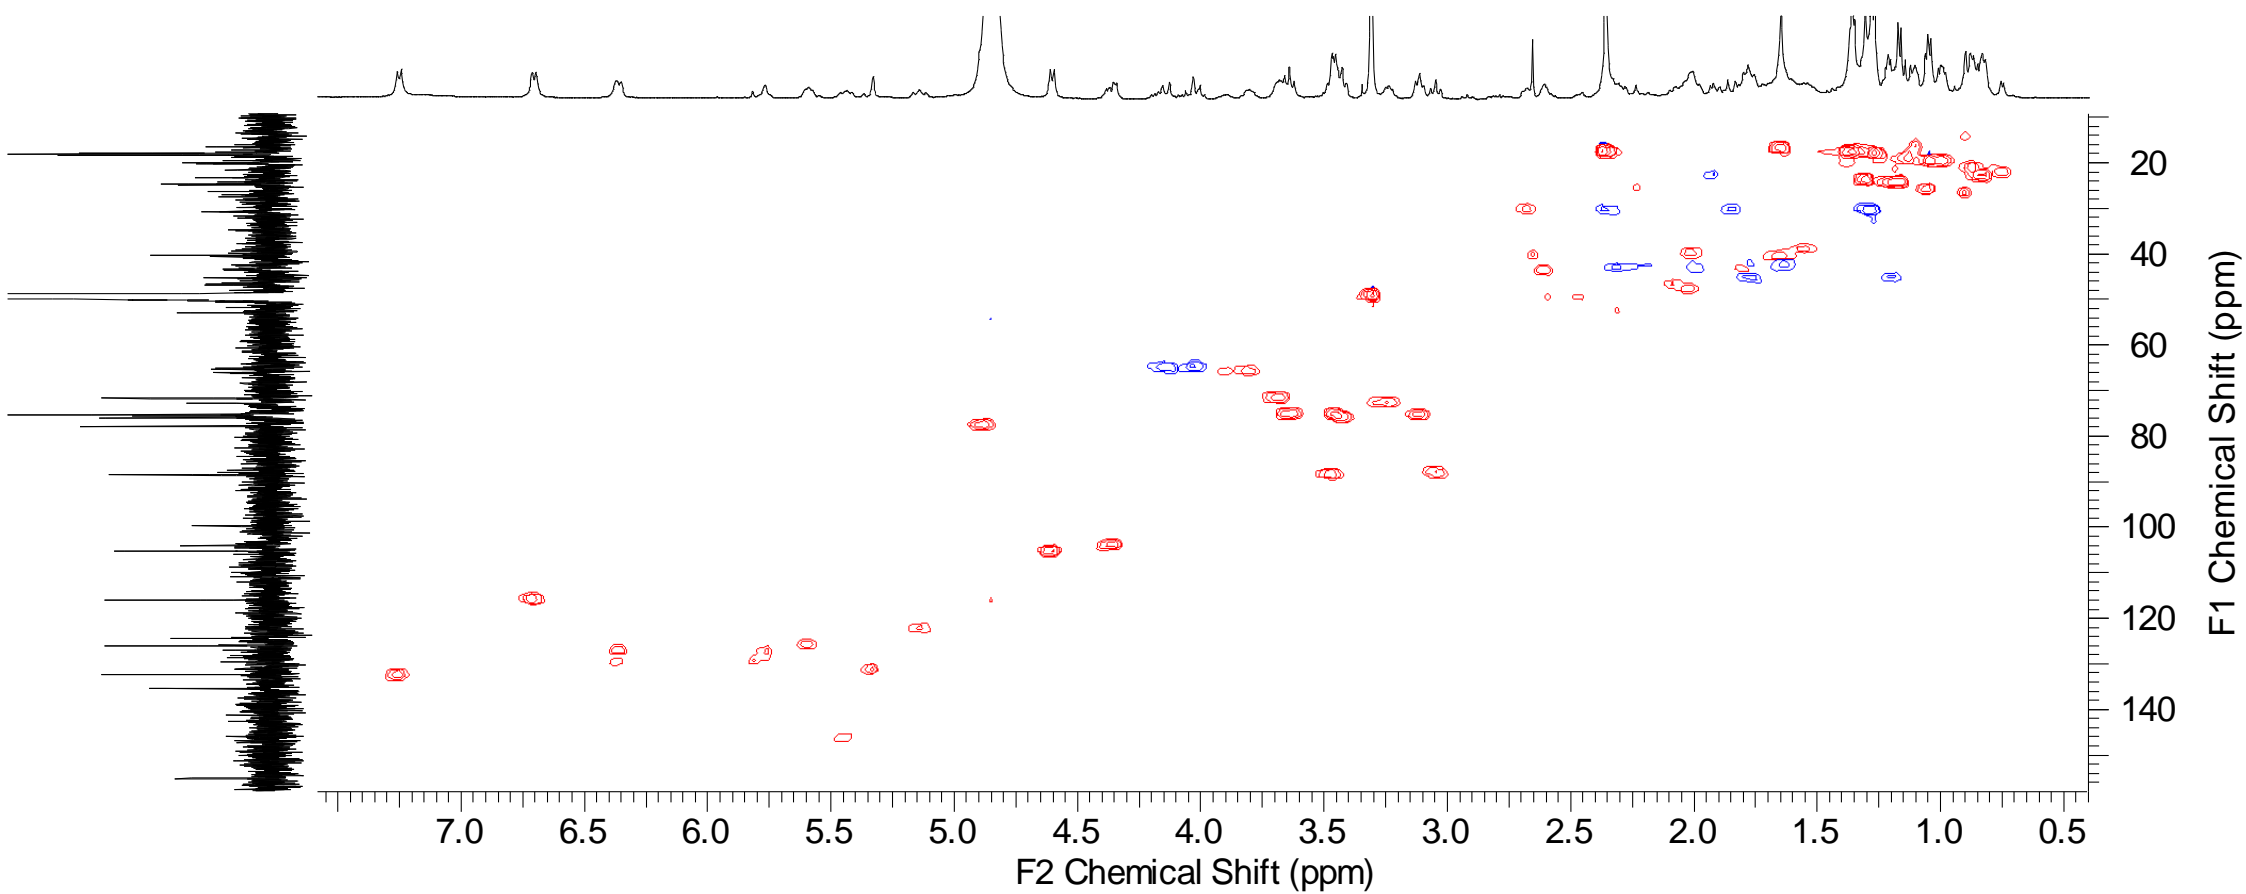

Figure S13. HSQC spectrum of compound 2.

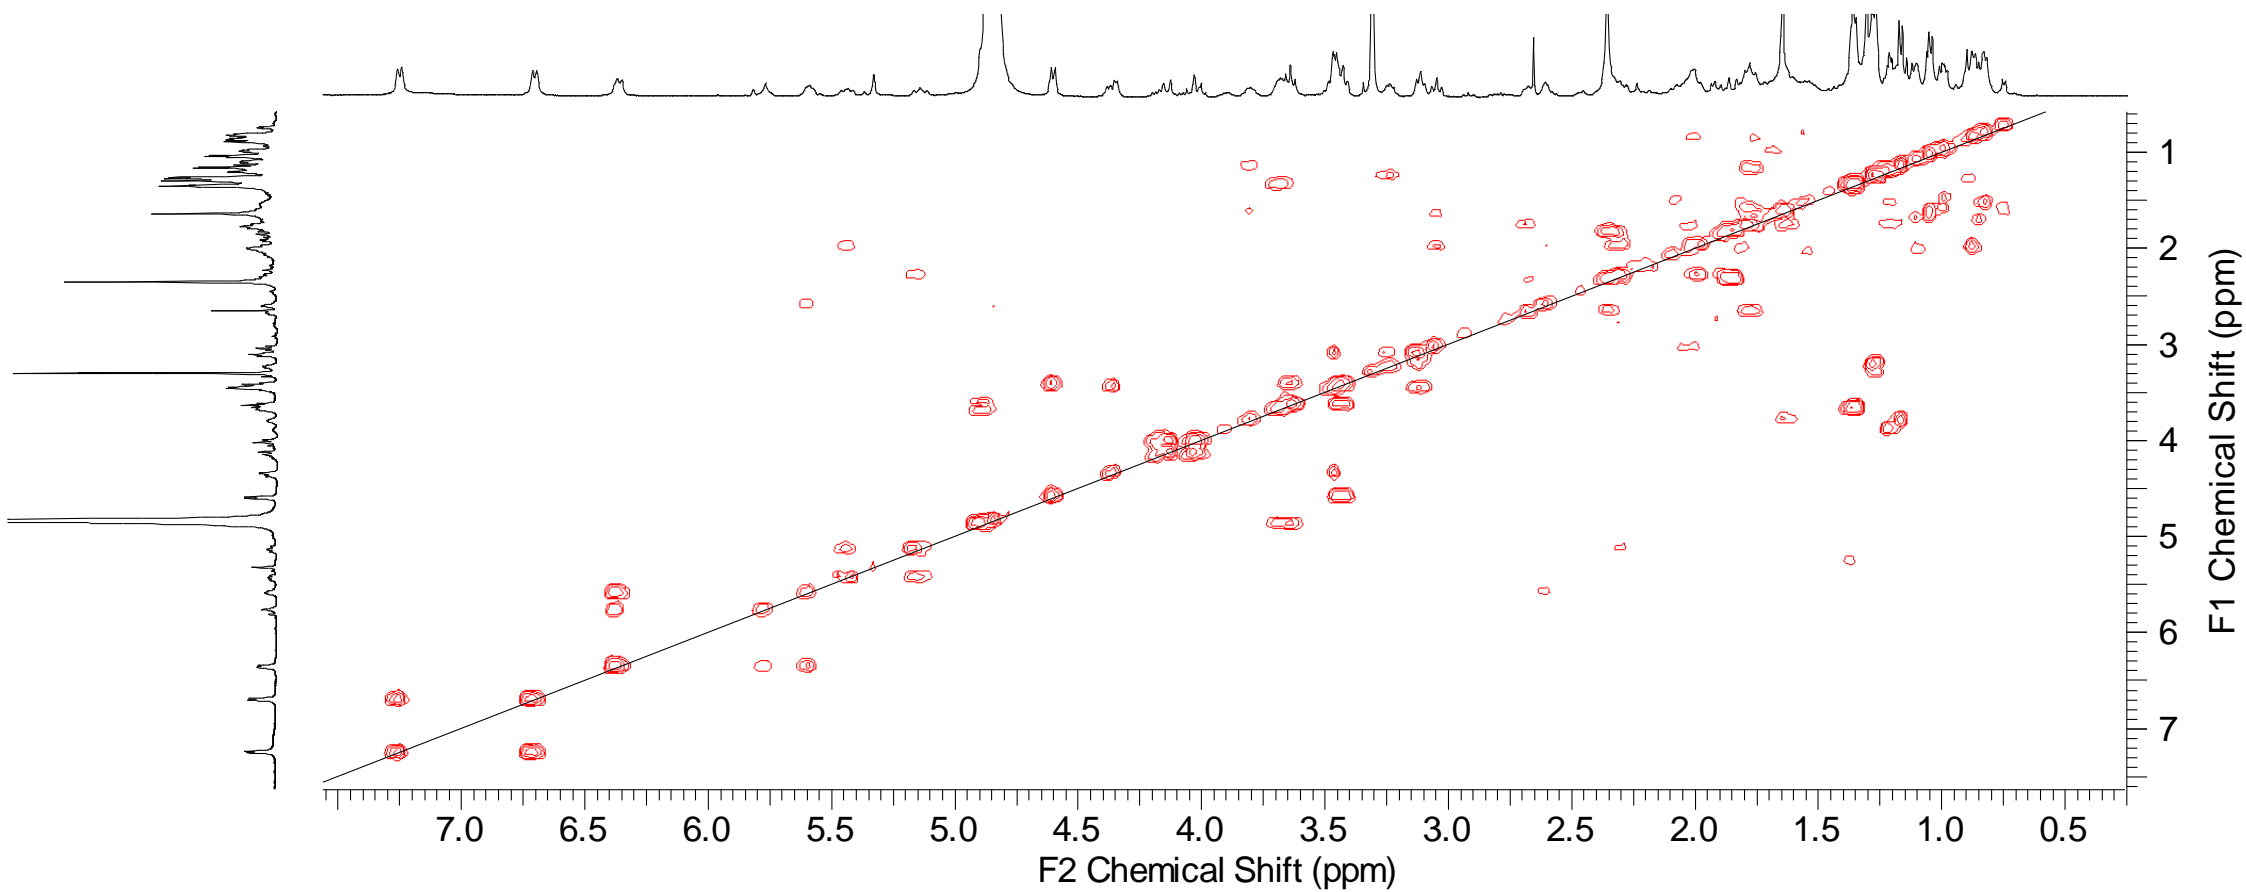

**Figure S14.** COSY spectrum of compound 2.

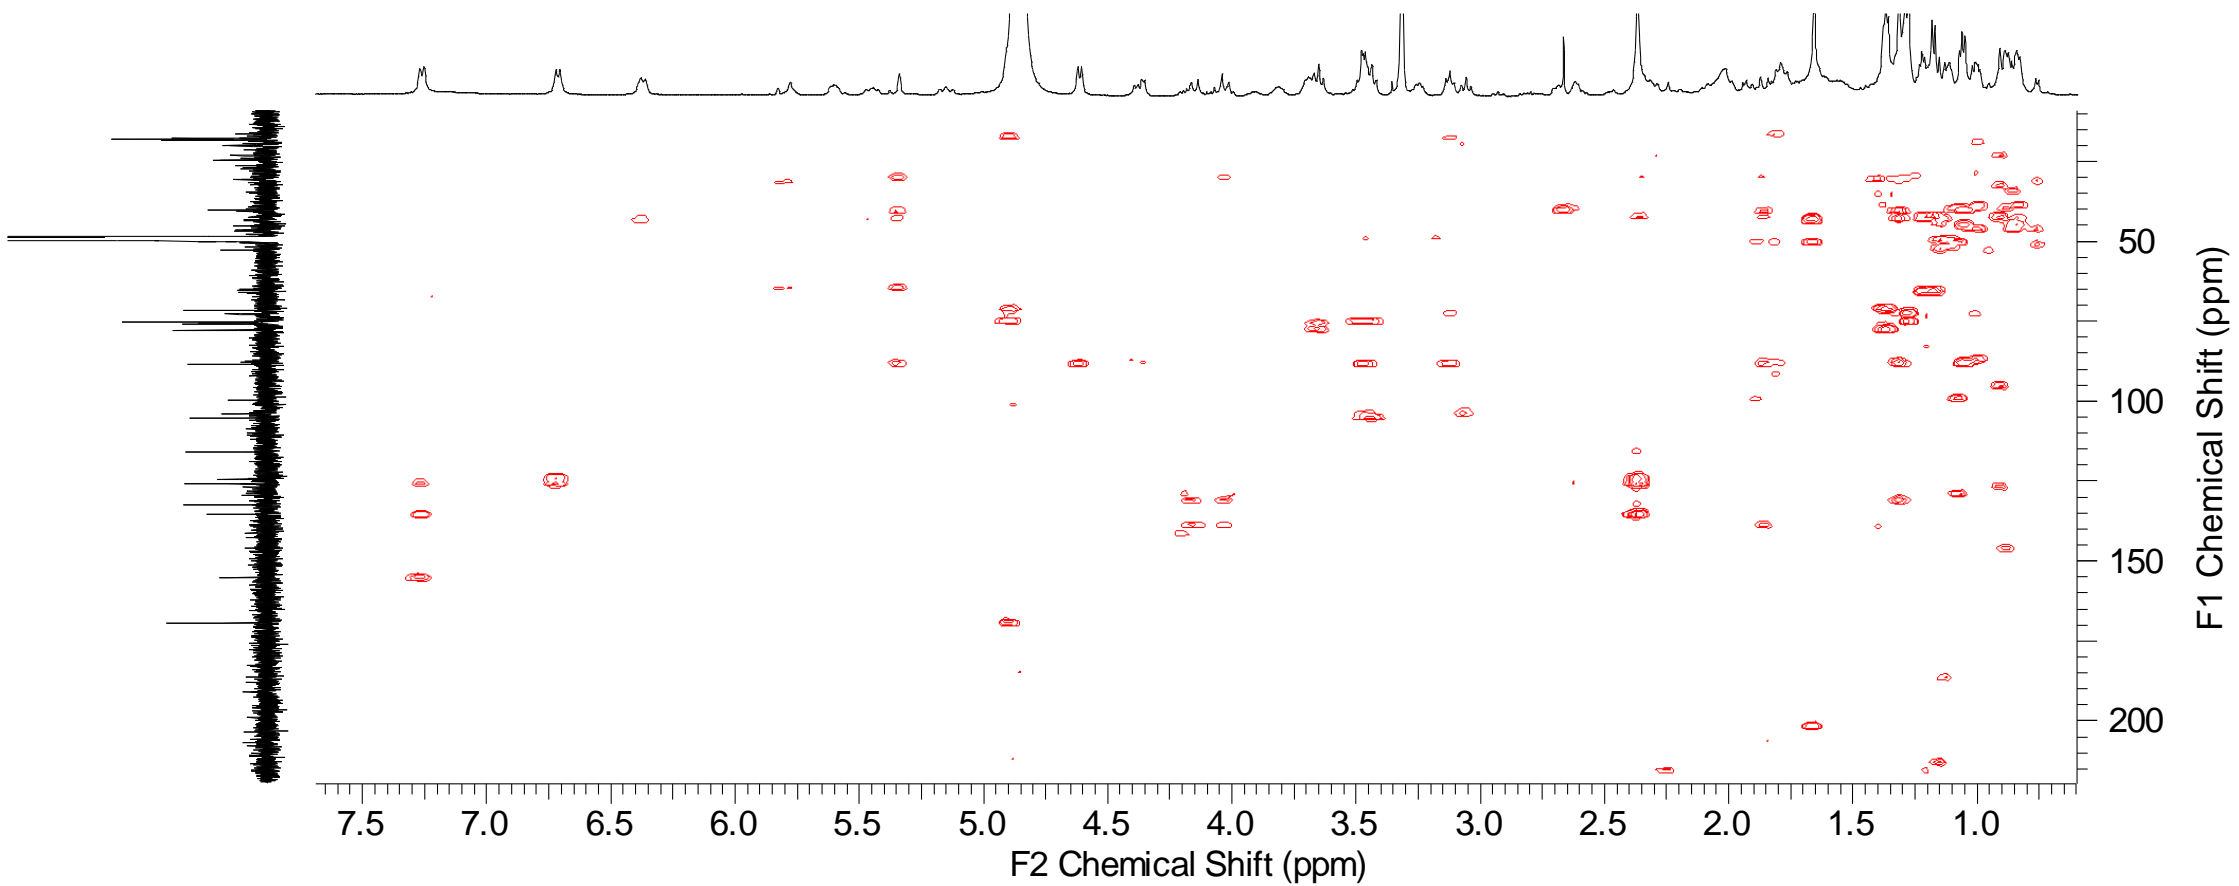

**Figure S15.** HMBC spectrum of compound 2.

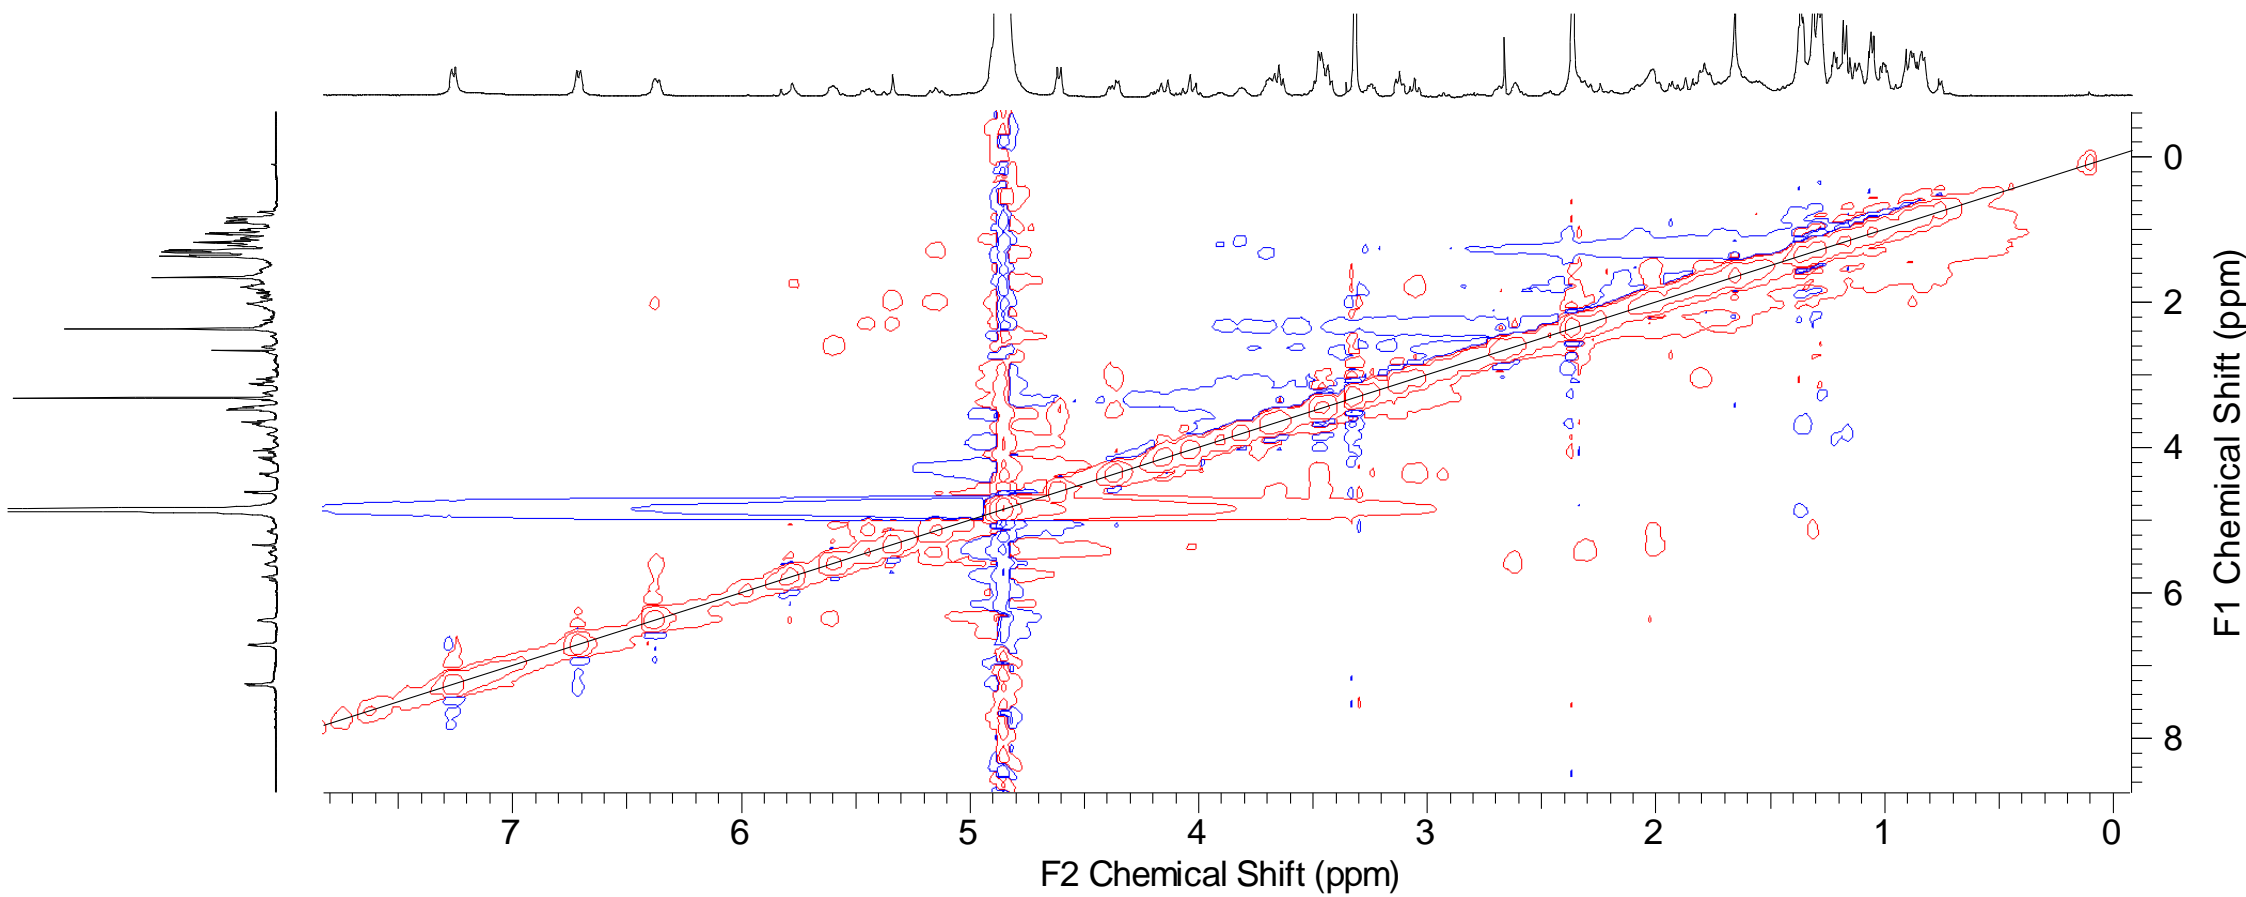

**Figure S16.** NOESY spectrum of compound 2.

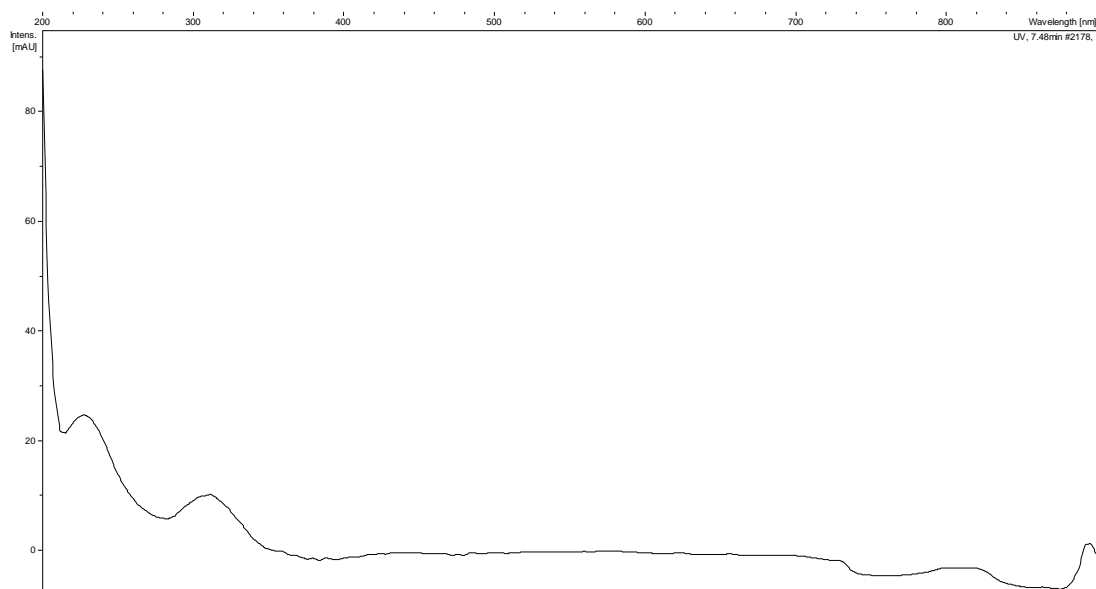

**Figure S17.** UV spectrum of compound **6**.

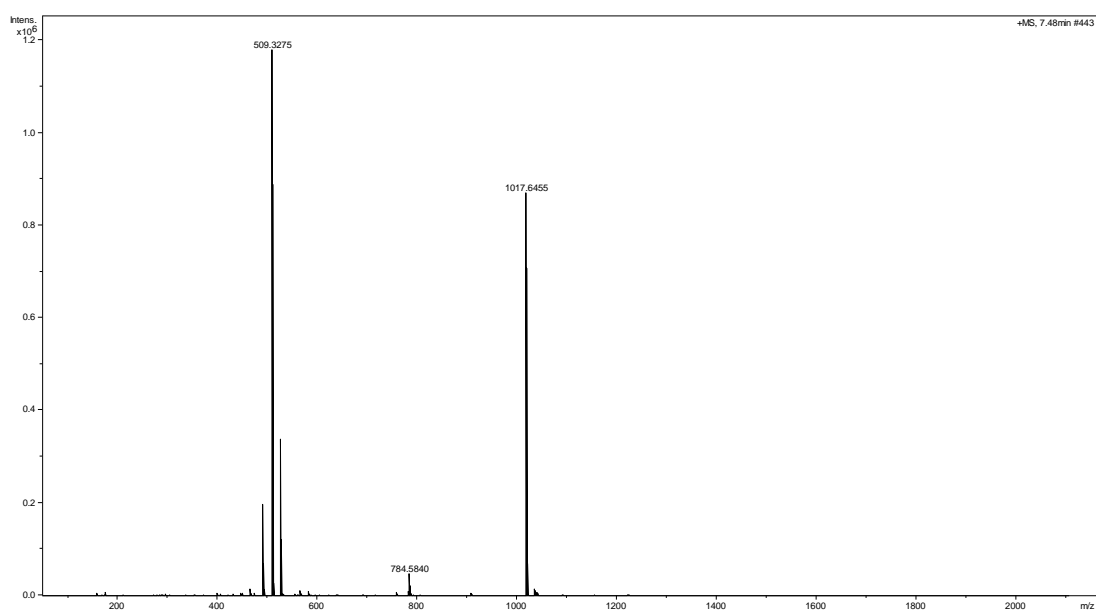

**Figure S18.** ESI-TOF spectrum of compound **6**.

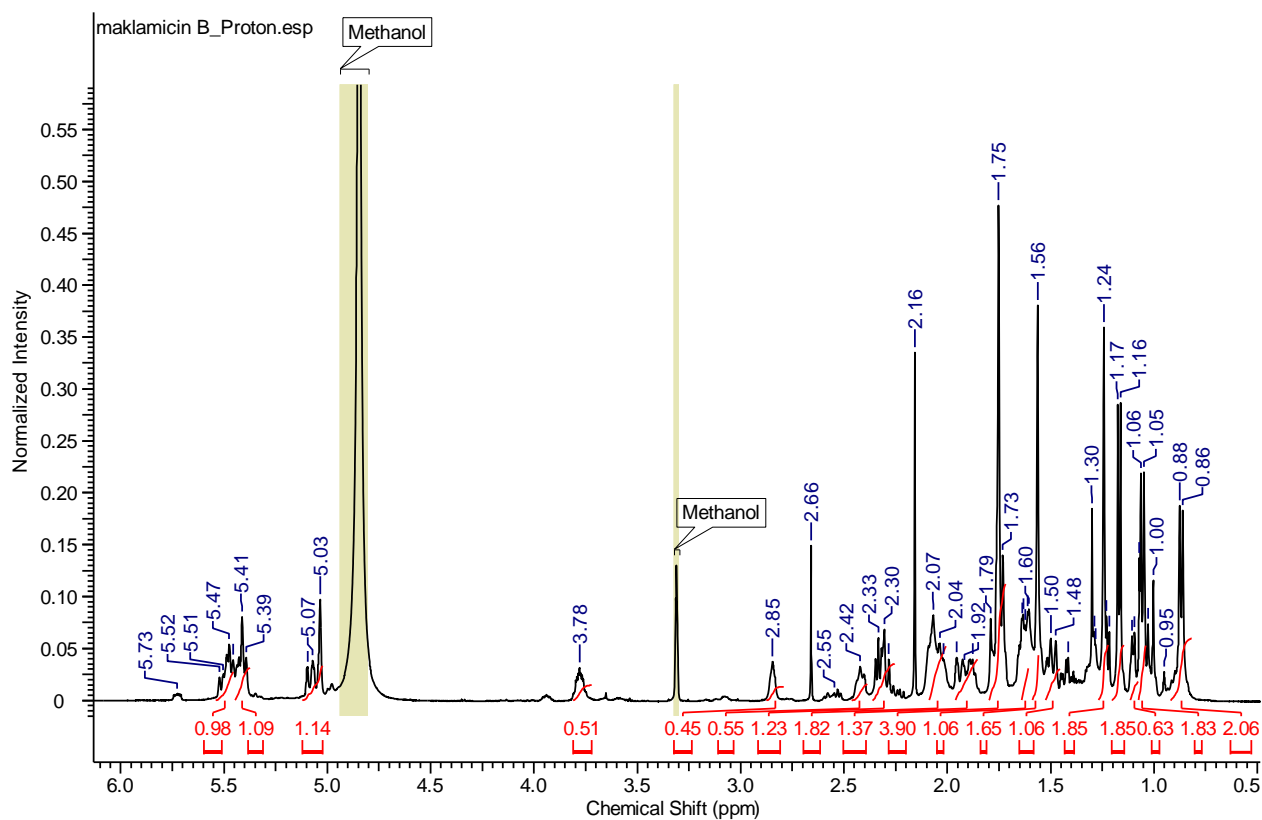

**Figure S19.**  $^1\text{H}$  NMR (methanol- $d_4$ , 500 MHz) spectrum of compound **6**.

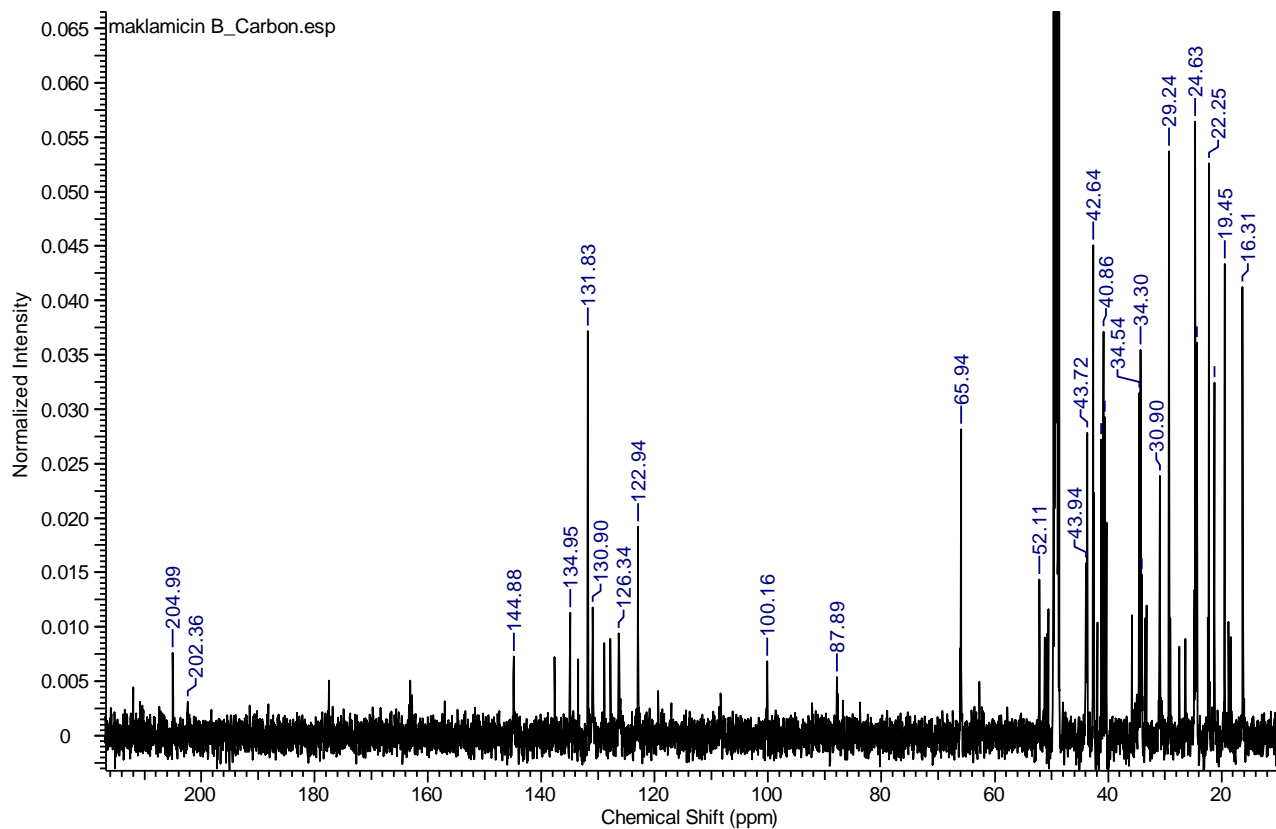

**Figure S20.**  $^{13}\text{C}$  NMR (methanol- $d_4$ , 125 MHz) spectrum of compound **6**.

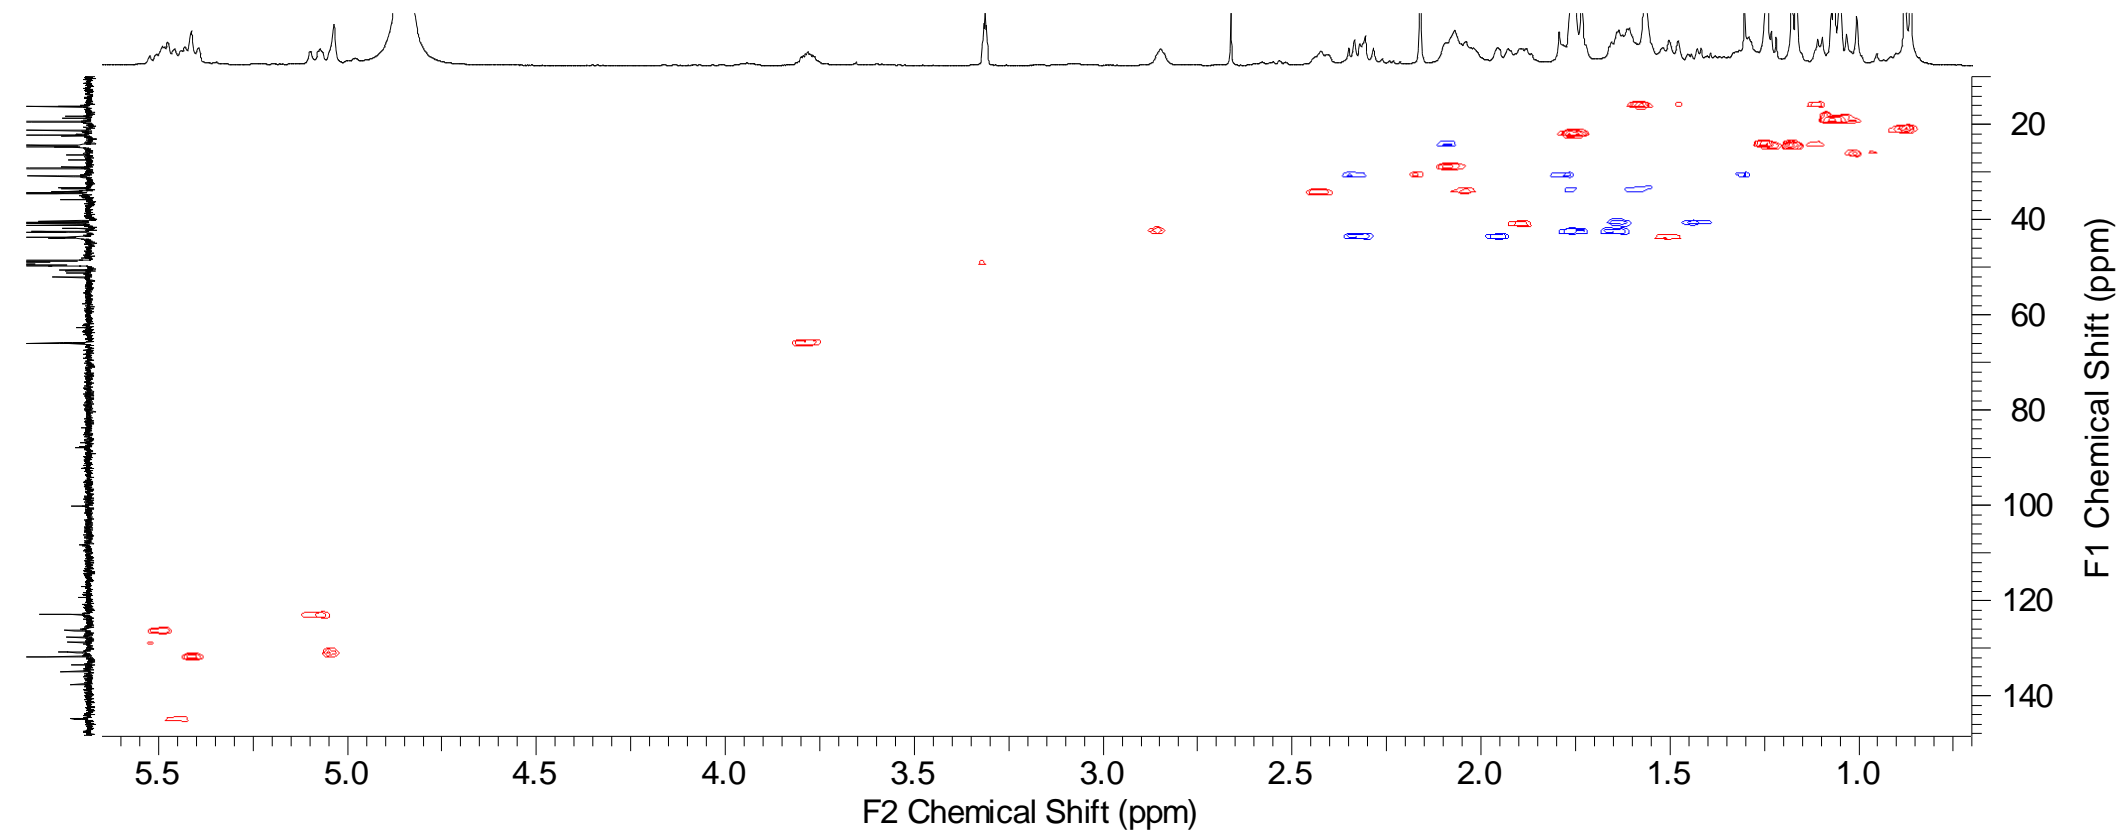

Figure S21. HSQC spectrum of compound 6.





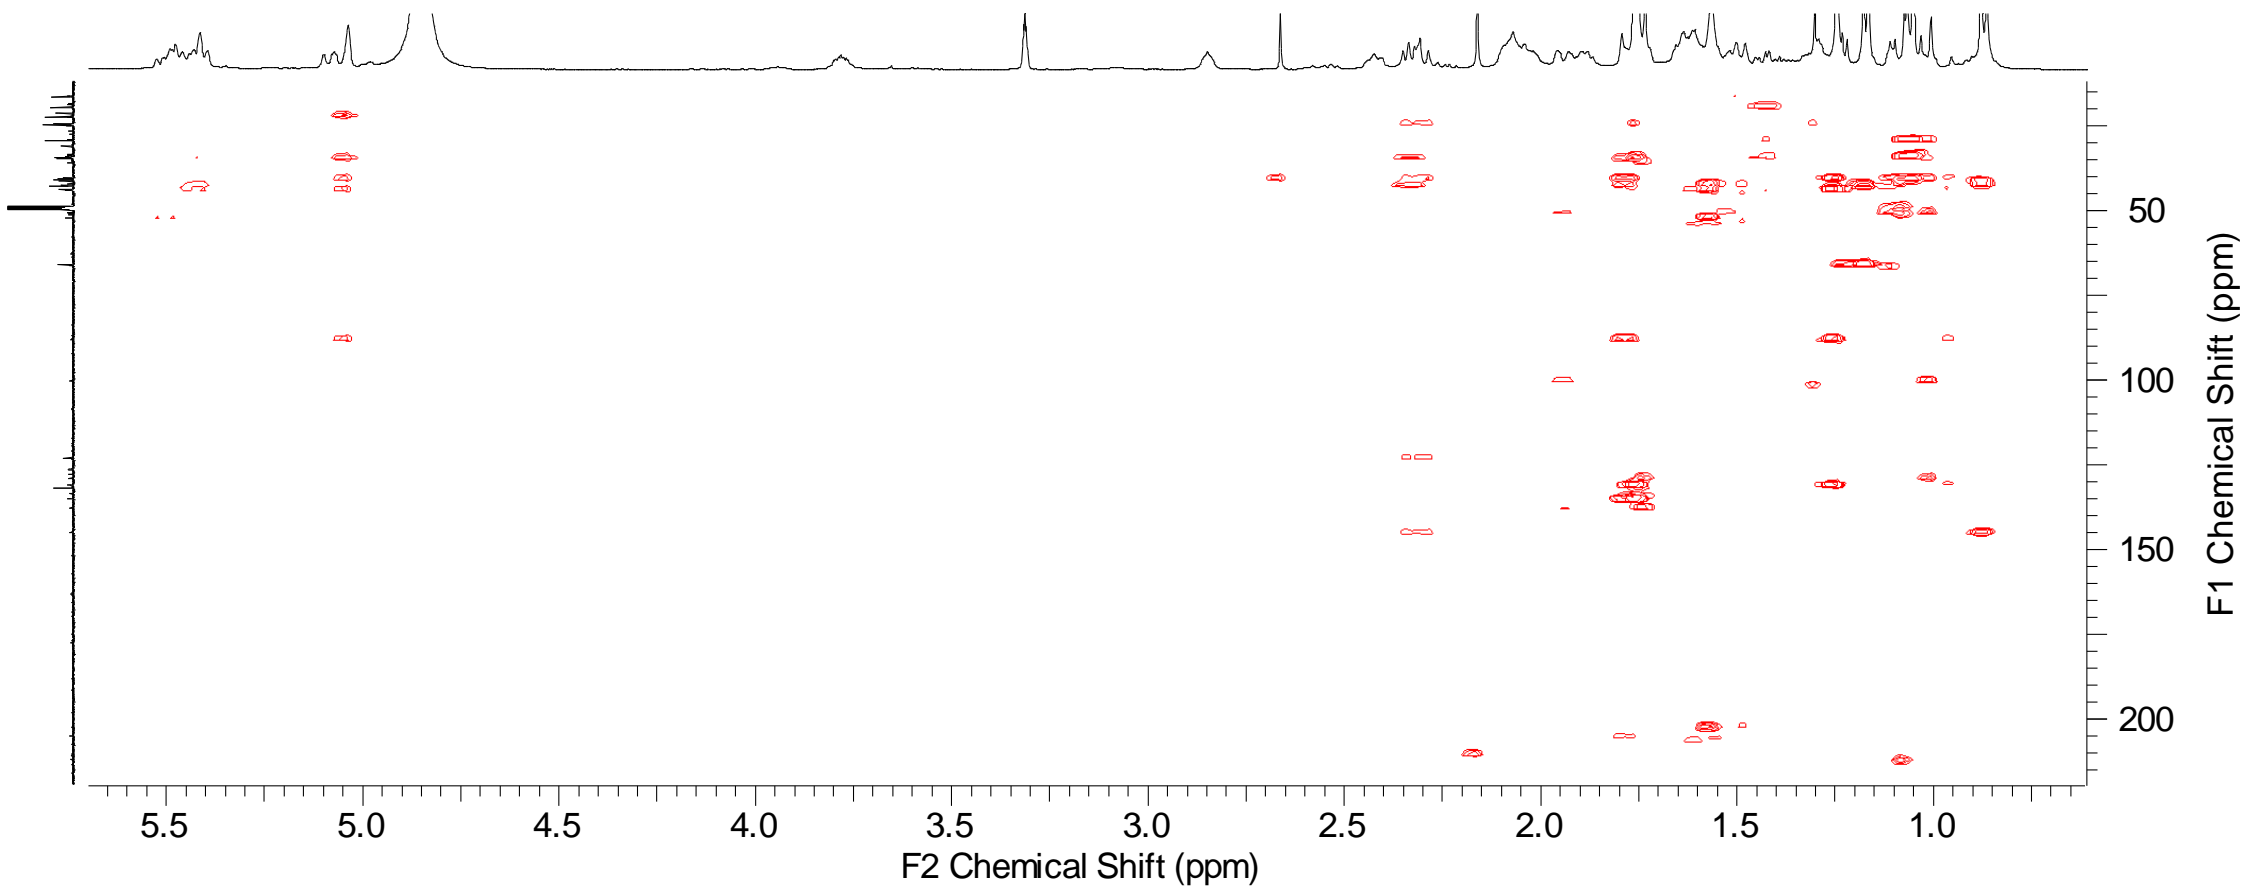

**Figure S23.** HMBC spectrum of compound **6**.

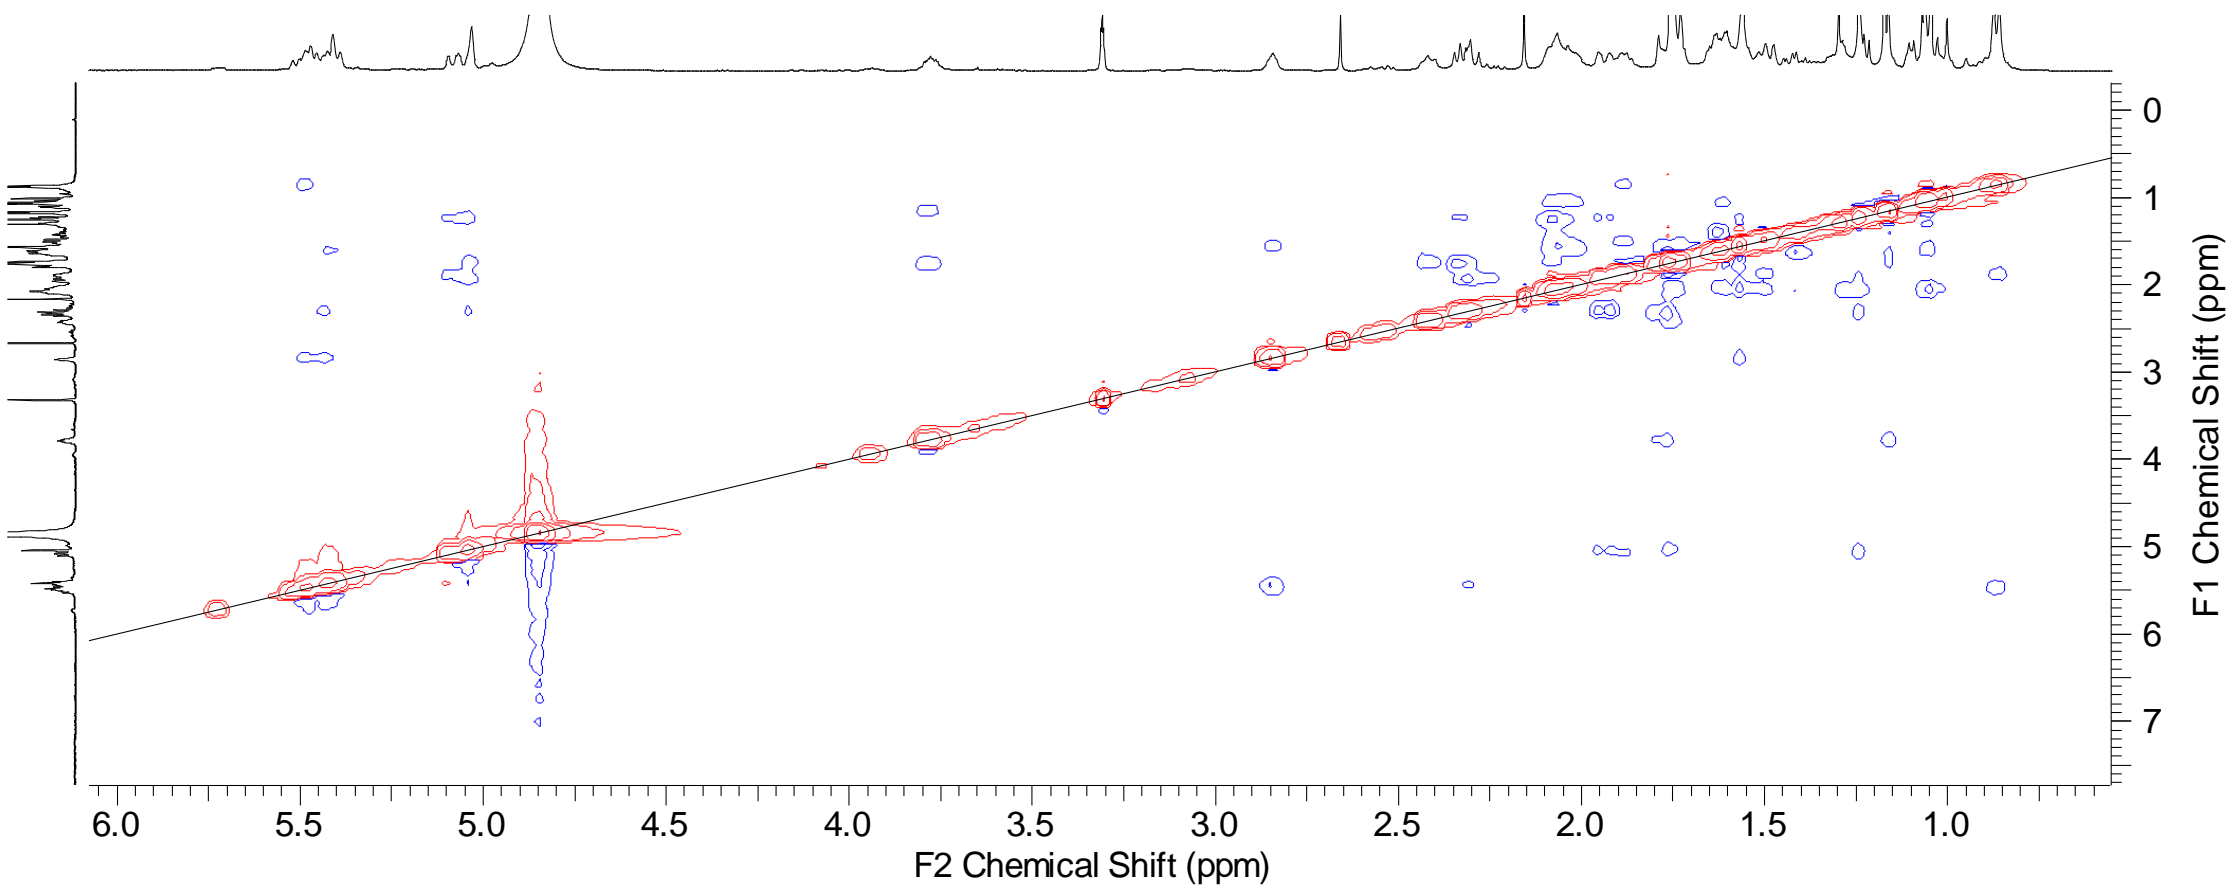

**Figure S24.** ROESY spectrum of compound 6.



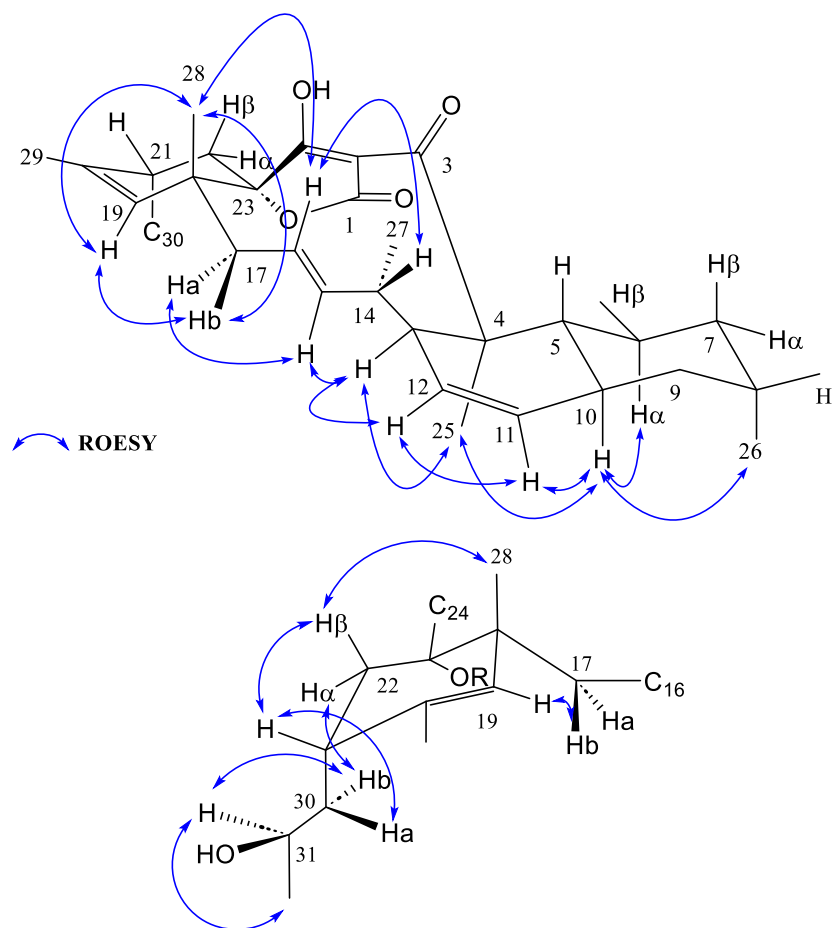

**Figure S26.** Key ROESY correlations observed in maklamicin B (6).
